# Supplementary figures and images for: Remote Dwelling Location Is a Risk Factor for CKD Among Indigenous Canadians
Source: PubMed Central journal article supplement — Kidney Int Rep. 2018 Feb 10;3(4):825–32. doi: 10.1016/j.ekir.2018.02.002 (PMC6035135; doi:10.1016/j.ekir.2018.02.002), 2018-02-10

Appendix Figure 1. Criteria for determining kidney failure risk (Tangri et. al, 2011)

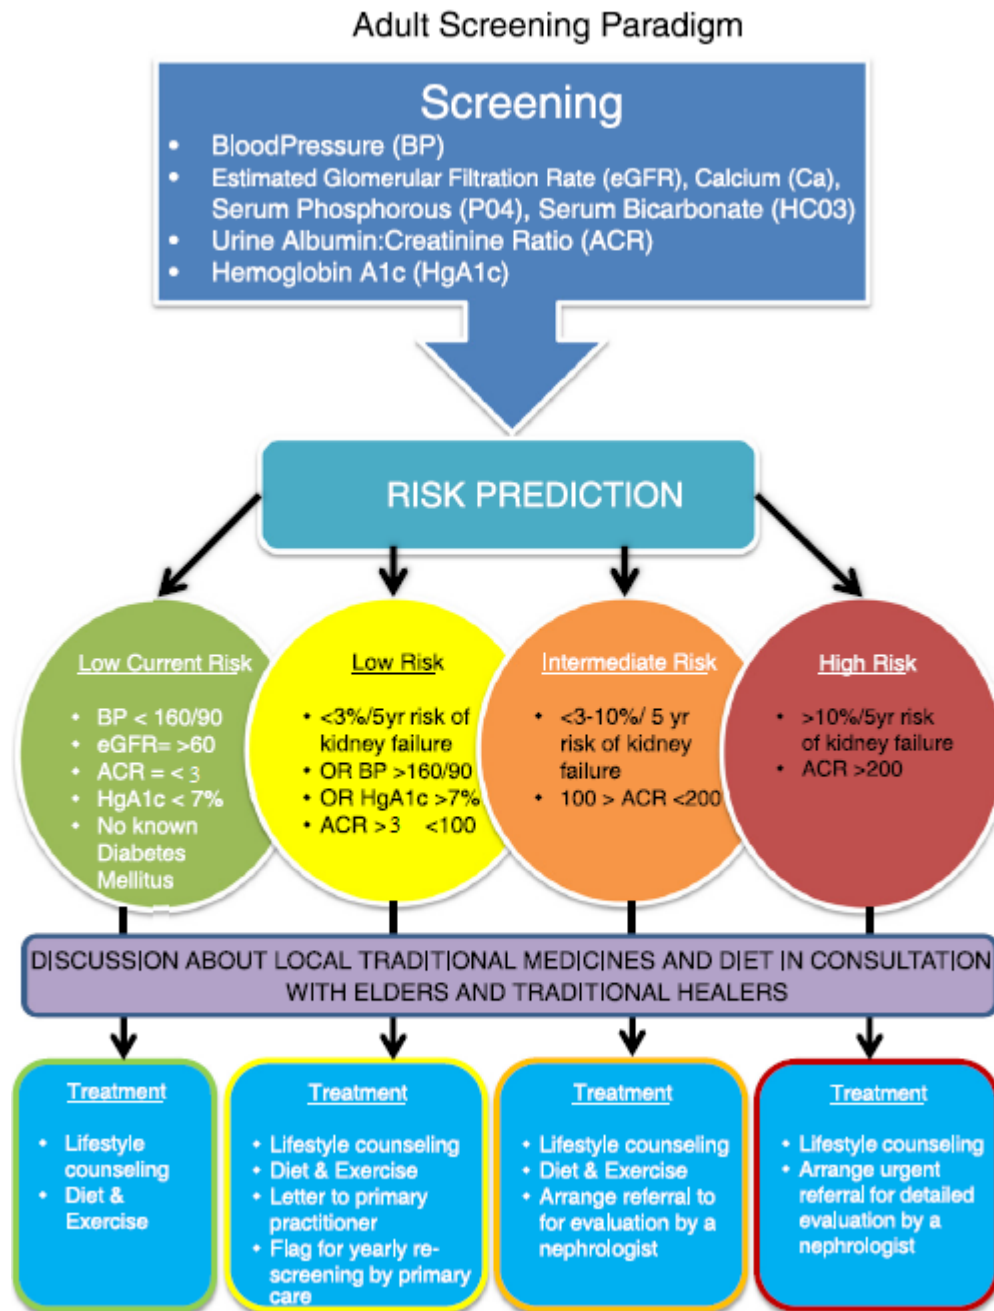

Supplement: mmc1.pdf [file mmc1.pdf]
